# Supplementary material
Source: HighWire-hosted journal article supplement (http://www.jneurosci.org/highwire/filestream/602263/field_highwire_adjunct_files/0/Supplemental_Material.pdf)
Supplement: Supplemental_Material.pdf [file Supplemental_Material.pdf]

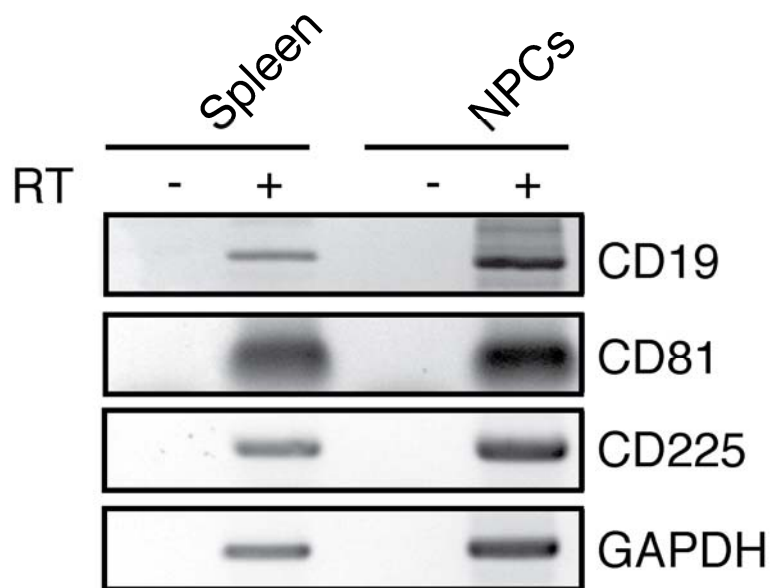

**Supplementary Figure 1. NPCs express molecular components of the B cell receptor complex: CD19, CD81 and CD225.**

(A) Specific primer sets for CD19, CD81, CD225, or GAPDH as a control, were used to amplify transcripts using RT-PCR. cDNA was synthesized with oligo-dT primers in the presence (RT+) or absence (RT-) of reverse transcriptase from total RNA extracted from primary mouse NPCs or from wildtype spleen as a positive control. NPCs expressed all three molecules known to be components of the B cell receptor complex.

**Supplementary Video 1. Cr2-cre controlled EGFP reporter gene is expressed in neural progenitor cells of the SGZ.** A stack of deconvoluted confocal images was reconstructed and presented as a rotating image in a movie. Sox2 (red), EGFP (green), Tomato (blue) from a Cr2-cre;mT/mG reporter mouse.

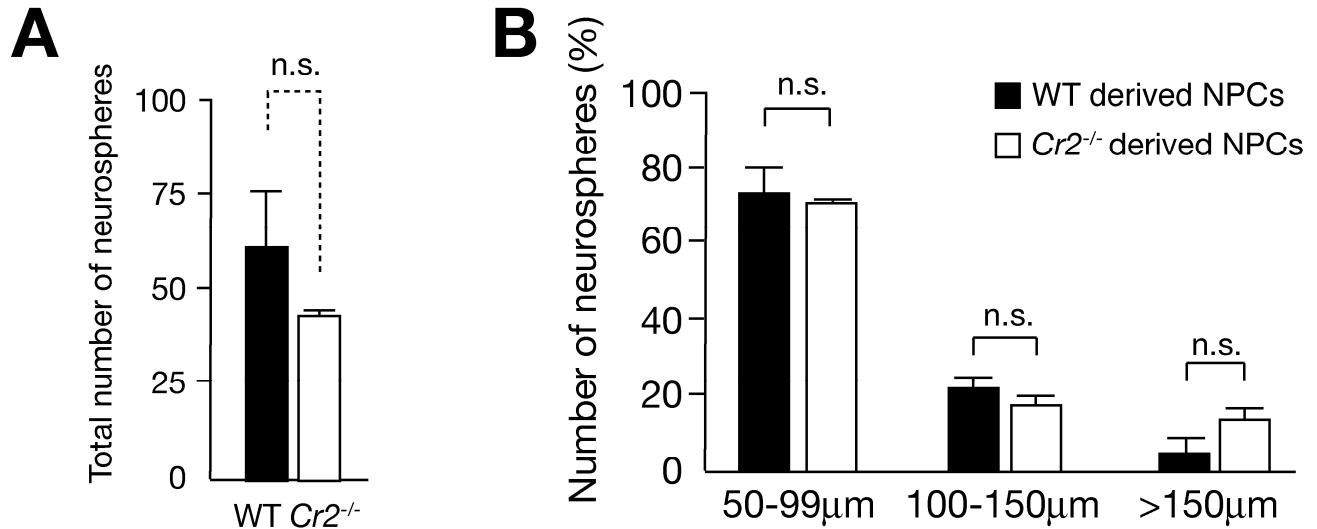

**Supplementary Figure 2. Neurosphere formation is not significantly changed in NPCs derived from  $Cr2^{-/-}$  compared with wildtype littermate control mice.**

Primary mouse neurospheres were isolated from newly born  $Cr2^{-/-}$  (open bars) and wildtype (WT; closed bars) controls and established cultures were seeded into 24-well plates. Total neurosphere number per field (A) and neurosphere size (B) in mouse NPC culture evaluated at passage 5. Bars represent mean + SEM from triplicate cultures. No significant differences were found by ANOVA.

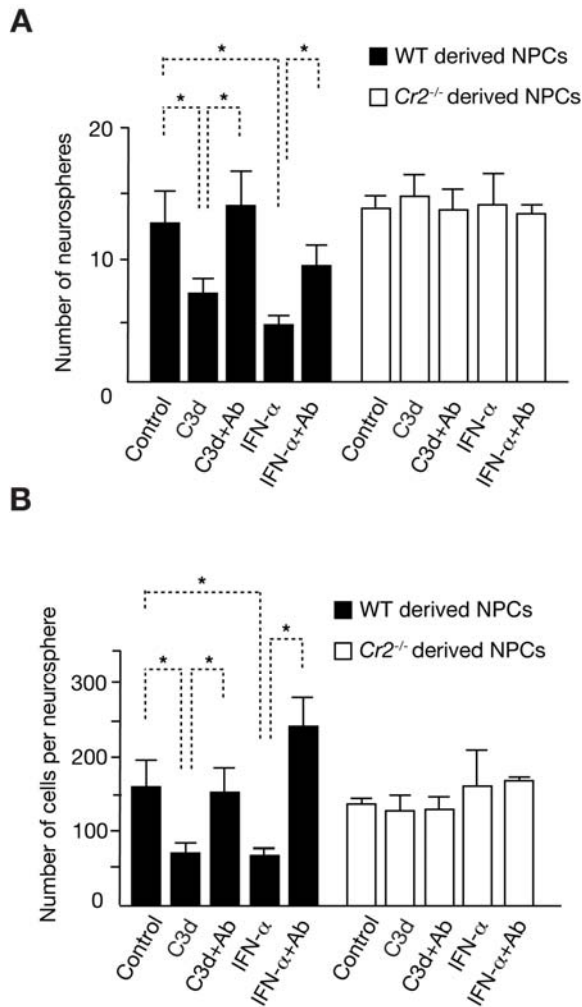

**Supplementary Figure 3. CD21 ligands reduce the number of neurospheres in primary mouse NPCs.** Primary mouse NPCs isolated from forebrains of *Cr2*<sup>-/-</sup> (open bars) and wildtype (WT; closed bars) mice and treated with purified human C3d (10  $\mu$ g/ml) or IFN- $\alpha$  (1000U/ml) in the presence or absence of anti-CD21/CD35 antibody 7G6 (Ab), which blocks ligand binding, or with vehicle as a control for 48 h. (A) Average number of neurospheres > 50  $\mu$ m per field (average of 3 fields at 20 x magnification) from triplicate cultures. (B) Average number of cells per neurosphere calculated as the ratio of total cell number/neurosphere number. Bars represent mean + SEM from triplicate cultures from one of 2 representative experiments. \*,  $P < 0.05$  by one-way ANOVA and Scheffe's posthoc test. Note the inhibitory effect of CD21 ligands in WT but not in *Cr2*<sup>-/-</sup> NPCs.

Supplementary Table 1: Primers used for RT-PCR and q-PCR

| For RT-PCR |              |                           |                     |              |
|------------|--------------|---------------------------|---------------------|--------------|
|            | Name         | Sequence (5' - 3')        | Predicted size (bp) | NCBI Gene ID |
| Cr2        | mCr2-F       | GTTCCAGTTAAGTGAGAGTGC     | 464                 | 12902        |
|            | mCr2-R       | CAGGATCCCAGGTATTATTGGC    |                     |              |
| GAPDH1     | GAPDH-F      | ACCACAGTCCATGCCATCAC      | 452                 | 14433        |
|            | GAPDH-R      | TCCACCACCCTGTTGCTGTA      |                     |              |
| EGFP       | EGFP-F       | AGGACGACGGCAACTACAAG      | 309                 | N/A          |
|            | EGFP-R       | TGGGTGCTCAGGTAGTGGTT      |                     |              |
| Beta Actin | Beta-Actin-F | GGGTCAGAAGGACTCCTATG      | 90                  | 11461        |
|            | beta-Actin-R | GTAACAATGCCATGTTCAAT      |                     |              |
| CD19       | mCD19-F      | ATGCTCAGCGTTGGGCTGCTGGC   | 543                 | 12478        |
|            | mCD19-R      | CTAGGTCGTCAGACTTATCC      |                     |              |
| CD81       | mCD81-F      | AGCCTGCTGTACCTGGAAGTGGG   | 636                 | 12520        |
|            | mCD81-R      | CTGTGAGGTGGCTGCAGGCATCTGG |                     |              |
| CD225      | mCD225-F     | GCCTTCATCACCGCTGCCAGTGG   | 316                 | 66141        |
|            | mCD225-R     | CCAAGGTGCTGATGTTCAAGCAC   |                     |              |
|            |              |                           |                     |              |
| For qPCR   |              |                           |                     |              |
|            | Name         | Sequence (5' - 3')        | Predicted size (bp) | NCBI Gene ID |
| Cr2        | mCr2-q-F     | ATCAGAAAGGCTTCTTTAGGGTG   | 143                 | 12902        |
|            | mCr2-q-R     | CGTGCCTCTCCAGCCATAAG      |                     |              |
| GAPDH1     | mGAPDH-q-F   | TGGCAAAGTGGAGATTGTTGCC    | 156                 | 14433        |
|            | mGAPDH-q-R   | AAGATGGTGATGGGCTTCCCG     |                     |              |

Supplementary Table 2: antibodies tested in our study

| Name of antibody | Monoclonal /polyclonal | Antibody species x antigen species | Source                   | Western blotting of spleen | IHC on spleen | IHC on Brain |
|------------------|------------------------|------------------------------------|--------------------------|----------------------------|---------------|--------------|
| 171              | MoAb                   | Mou x Hum                          | Mike Holers              | +                          | N/A           | -            |
| 629              | MoAb                   | Mou x Hum                          | Mike Holers              | +                          | N/A           | -            |
| 1048             | MoAb                   | Mou x Hum                          | Mike Holers              | +                          | N/A           | -            |
| Isotype control  | MoAb                   | Rat IgG2a-kappa                    | Biolegend                | -                          | -             | -            |
| 8C12             | MoAb                   | Rat x Mou                          | BD                       | -                          | +             | -            |
| 7E9              | MoAb                   | Rat x Hum                          | Biolegend                | -                          | +             | -            |
| 7G6              | MoAb                   | Rat x Mou                          | Biolegend                | -                          | +             | -            |
| EP3093           | MoAb                   | Rab x Hum                          | Epitomics                | +                          | +             | -            |
| D-19             | PoAb                   | Goa x Mou                          | Santa Cruz Biotechnology | +                          | N/A           | -            |
| M-19             | PoAb                   | Goa x Mou                          | Santacruz Biotechnology  | +                          | N/A           | -            |
| A-3              | MoAb                   | Mou x Hum                          | Santacruz Biotechnology  | -                          | N/A           | -            |
| 31R              | MoAb                   | Mou x Hum                          | Cell Sciences            | -                          | N/A           | -            |
| 21B9             | MoAb                   | Mou x Hum                          | Cell Sciences            | -                          | N/A           | -            |
| B-ly4            | MoAb                   | Mou x Hum                          | Cell Sciences            | -                          | N/A           | -            |

MoAb monoclonal antibody, monoclonal; PoAb, polyclonal antibody
